# Supplementary material for: The hairpin region of Ndc80 is important for the kinetochore recruitment of Mph1/MPS1 in fission yeast
Source: PubMed Central journal article supplement (PMC4845937; doi:10.1080/15384101.2016.1148842), 2016-02-22
Supplement: kccy-15-05-1148842-s001.pdf [file kccy-15-05-1148842-s001.pdf]

## **Supplementary Material**

### **The hairpin region of Ndc80 is important for the kinetochore recruitment of Mph1/MPS1 in fission yeast**

Aldona Ewa Chmielewska , Ngang Heok Tang and Takashi Toda

#### **Supplementary Table S1**

#### **Supplementary Figure legends**

**Figure S1.** *ndc80-AK01* contains a single point mutation in the internal hairpin region.

**Figure S2.** *ndc80-AK01* is defective in the SAC

**Figure S3.** Mad1, Mad3, Bub1 and Bub3 are mis-localized from the kinetochore in *ndc80-AK01*

**Figure S4.** Ark1-GFP does not localize to the unattached kinetochores in both *ndc80-AK01* and *bub1Δ* cells.

#### **Supplementary Figures 1-4**

**Supplementary Table S1. List of strains used in the study.**

| Strain  | Genotype                                                                                                                                                                                                                                     | Figures used |
|---------|----------------------------------------------------------------------------------------------------------------------------------------------------------------------------------------------------------------------------------------------|--------------|
| AEK513  | <i>h<sup>-</sup> ndc80-AK01-kan<sup>R</sup> mad1::ura4<sup>+</sup> leu1 ura4</i>                                                                                                                                                             | 1B           |
| 513     | <i>h<sup>-</sup> leu1 ura4</i>                                                                                                                                                                                                               | 1B, 2A-C     |
| AEK423  | <i>h<sup>-</sup> mad1::ura4<sup>+</sup> leu1 ura4</i>                                                                                                                                                                                        | 1B, 2C       |
| AEK004  | <i>h<sup>-</sup> ndc80-AK01-kan<sup>R</sup> leu1 ura4 his2</i>                                                                                                                                                                               | 1B, 2A-C     |
| AEK220  | <i>h<sup>+</sup> spc25<sup>+</sup>-YFP-nat<sup>R</sup> nuf2<sup>+</sup>-mCherry-ura4<sup>+</sup> cut12<sup>+</sup>-2CFP-hph<sup>R</sup> leu1 ura4 his2</i>                                                                                   | 1D-E         |
| AEK342  | <i>h<sup>-</sup> spc25<sup>+</sup>-YFP-nat<sup>R</sup> nuf2<sup>+</sup>-mCherry-ura4<sup>+</sup> cut12<sup>+</sup>-2CFP-hph<sup>R</sup> ndc80-AK01-kan<sup>R</sup></i>                                                                       | 1D-E         |
| AEK053  | <i>h<sup>-</sup> mad2::LEU2 leu1 ura4</i>                                                                                                                                                                                                    | 2A-B         |
| AEK156  | <i>h<sup>+</sup> ndc80-AK01-kan<sup>R</sup> cut7-446 leu1 his2</i>                                                                                                                                                                           | 2D-E         |
| AEK051  | <i>h<sup>+</sup> cut7-446 leu1 his2</i>                                                                                                                                                                                                      | 2D-E         |
| AEK150  | <i>h<sup>+</sup> cut7-446 mad2::LEU2 his2</i>                                                                                                                                                                                                | 2D-E         |
| AEK595  | <i>h<sup>-</sup> ndc80-AK01-kan<sup>R</sup> mad2<sup>+</sup>-GFP-LEU2 plo1<sup>+</sup>-mCherry-hph<sup>R</sup> ura4</i>                                                                                                                      | 3A-D, 3H-I   |
| AEK505  | <i>h<sup>-</sup> plo1<sup>+</sup>-mCherry-hph<sup>R</sup> mad2<sup>+</sup>-GFP-LEU2 leu1 lys1</i>                                                                                                                                            | 3A-D,3H-I    |
| AEK531  | <i>h<sup>-</sup> mph1<sup>+</sup>-S(GGGGS)3-GFP&lt;&lt;kan<sup>R</sup> plo1<sup>+</sup>-mCherry-hph<sup>R</sup> leu1</i>                                                                                                                     | 3E-I         |
| AEK709  | <i>h<sup>+</sup> ndc80-AK01-kan<sup>R</sup> mph1<sup>+</sup>-S(GGGGS)3-GFP&lt;&lt;kan<sup>R</sup> plo1<sup>+</sup>-mCherry-hph<sup>R</sup> leu1 ura4 his2</i>                                                                                | 3E-I         |
| AEK700  | <i>h<sup>-</sup> leu1 ark1<sup>+</sup>-GFP&lt;&lt;kan<sup>R</sup> plo1<sup>+</sup>-mCherry-hph<sup>R</sup> ndc80-AK01-kan<sup>R</sup></i>                                                                                                    | 3H-I, S4     |
| AEK704  | <i>h<sup>-</sup> plo1<sup>+</sup>-mCherry-hph<sup>R</sup> ark1<sup>+</sup>-GFP&lt;&lt;kan<sup>R</sup> leu1 lys1</i>                                                                                                                          | 3H-I, S4     |
| AEK501  | <i>h<sup>-</sup> plo1<sup>+</sup>-mCherry-hph<sup>R</sup> mad1<sup>+</sup>-GFP&lt;&lt;kan<sup>R</sup> lys1 ura4</i>                                                                                                                          | 3H-I, S3A-B  |
| AEK618  | <i>h<sup>-</sup> ndc80-AK01-kan<sup>R</sup> plo1<sup>+</sup>-mCherry-hph<sup>R</sup> mad1<sup>+</sup>-GFP&lt;&lt;kan<sup>R</sup> ura4 ade6-210 lys1</i>                                                                                      | 3H-I, S3A-B  |
| AEK526  | <i>h<sup>+</sup> plo1<sup>+</sup>-mCherry-hph<sup>R</sup> mad3<sup>+</sup>-GFP&lt;&lt;kan<sup>R</sup> leu1 his2</i>                                                                                                                          | 3H-I, S3C-D  |
| AEK641  | <i>h<sup>-</sup> mad3<sup>+</sup>-GFP&lt;&lt;kan<sup>R</sup> ndc80-AK01-kan<sup>R</sup> plo1<sup>+</sup>-mCherry-hph<sup>R</sup> leu1</i>                                                                                                    | 3H-I, S3C-D  |
| AEK590  | <i>h<sup>+</sup> ndc80-AK01-kan<sup>R</sup> bub1<sup>+</sup>-GFP-kan<sup>R</sup> plo1<sup>+</sup>-mCherry-hph<sup>R</sup> his2 ade6-210 ura4 lys1</i>                                                                                        | 3H-I, S3E-F  |
| AEK600  | <i>h<sup>+</sup> bub1<sup>+</sup>-GFP-kan<sup>R</sup> plo1<sup>+</sup>-mCherry-hph<sup>R</sup> his2 ade6-210 leu1 lys1 ura4</i>                                                                                                              | 3H-I, S3E-F  |
| AEK555  | <i>h<sup>-</sup> bub3<sup>+</sup>-S(GGGGS)3-GFP&lt;&lt;kan<sup>R</sup> plo1<sup>+</sup>-mCherry-hph<sup>R</sup> leu1</i>                                                                                                                     | 3H-I, S3G-H  |
| AEK634  | <i>h<sup>+</sup> bub3<sup>+</sup>-S(GGGGS)3-GFP&lt;&lt;kan<sup>R</sup> ndc80-AK01-kan<sup>R</sup> plo1<sup>+</sup>-mCherry-hph<sup>R</sup> leu1 his2</i>                                                                                     | 3H-I, S3G-H  |
| AEK1031 | <i>h<sup>+</sup> hph<sup>R</sup>&lt;&lt;Pnm81&lt;&lt;mis12<sup>+</sup>-(GGSG)2-mph1<sup>+</sup>-S(GGGGS)3-GFP&lt;&lt;kan<sup>R</sup> plo1<sup>+</sup>-mCherry&lt;&lt;nat<sup>R</sup> ndc80-AK01-kan<sup>R</sup> leu1 ade6-M216 ura4 his2</i> | 4A-C         |
| AEK1036 | <i>h<sup>-</sup> hph<sup>R</sup>&gt;&gt;Pnmt81&gt;&gt;mph1<sup>+</sup>-S(GGGGS)3-GFP&lt;&lt;kan<sup>R</sup> plo1<sup>+</sup>-mCherry&lt;&lt;nat<sup>R</sup> ndc80-AK01-kan<sup>R</sup> leu1</i>                                              | 4A-C         |
| AEK1107 | <i>h<sup>-</sup> hph<sup>R</sup>&lt;&lt;Pnmt81&lt;&lt;mis12<sup>+</sup>-(GGSG)2-mph1<sup>+</sup>-GFP&lt;&lt;kan<sup>R</sup> mad2Δ::hph<sup>R</sup> plo1<sup>+</sup>-mCherry-nat<sup>R</sup> ndc80-AK01-kan<sup>R</sup> leu1</i>              | 4A-C         |
| AEK986  | <i>h<sup>-</sup> hph<sup>R</sup>&gt;&gt;Pnmt81&gt;&gt;mph1<sup>+</sup>-S(GGGGS)3-GFP&lt;&lt;kan<sup>R</sup> plo1<sup>+</sup>-mCherry&lt;&lt;nat<sup>R</sup> leu1 ade6-M216?</i>                                                              | 4A-C         |
| AEK990  | <i>h<sup>-</sup> hph<sup>R</sup>&lt;&lt;Pnm81&lt;&lt;mis12<sup>+</sup>-(GGSG)2-mph1<sup>+</sup>-S(GGGGS)3-GFP&lt;&lt;kan<sup>R</sup> plo1<sup>+</sup>-mCherry&lt;&lt;nat<sup>R</sup> leu1 ade6-M216</i>                                      | 4A-C         |
| AEK991  | <i>h<sup>-</sup> hph<sup>R</sup>&lt;&lt;Pnmt81&lt;&lt;mis12<sup>+</sup>-(GGSG)2-mph1<sup>+</sup>-S(GGGGS)3-GFP&lt;&lt;kan<sup>R</sup> mad2Δ::hph<sup>R</sup> plo1<sup>+</sup>-mCherry-nat<sup>R</sup> leu1</i>                               | 4A-C         |
| AEK383  | <i>h<sup>+</sup> nda3-1828 leu1 ura4 his2</i>                                                                                                                                                                                                | S2A-B        |
| AEK400  | <i>h<sup>-</sup> ndc80-AK01-kan<sup>R</sup> nda3-1828 leu1 ura4</i>                                                                                                                                                                          | S2A-B        |

|        |                                                                                                                         |       |
|--------|-------------------------------------------------------------------------------------------------------------------------|-------|
| AEK403 | <i>h<sup>-</sup> nda3-1828 mad2::LEU2 leu1 ura4</i>                                                                     | S2A-B |
| AEK424 | <i>h<sup>+</sup> mph1::ura4<sup>+</sup> leu1 ura4 ade6-210</i>                                                          | S2C   |
| AEK425 | <i>h<sup>-</sup> bub1::LEU2 ura4 ade6-216</i>                                                                           | S2C   |
| AEK468 | <i>h<sup>-</sup> bub3::ura4<sup>+</sup> leu1 ura4</i>                                                                   | S2C   |
| AEK507 | <i>h<sup>-</sup> ndc80-AK01-kan<sup>R</sup> mph1::ura4<sup>+</sup> leu1 ura4 ade6-210</i>                               | S2C   |
| AEK510 | <i>h<sup>-</sup> ndc80-AK01-kan<sup>R</sup> bub1::LEU2 ura4 leu1 ade6-M216</i>                                          | S2C   |
| AEK517 | <i>h<sup>-</sup> ndc80-AK01-kan<sup>R</sup> mad3::ura4<sup>+</sup> leu1 ura4</i>                                        | S2C   |
| AEK521 | <i>h<sup>-</sup> ndc80-AK01-kan<sup>R</sup> bub3::ura4<sup>+</sup> leu1 ura4</i>                                        | S2C   |
| AEK586 | <i>h<sup>-</sup> ndc80-AK01-kan<sup>R</sup> mad2::LEU2 leu1 ura4 lys1</i>                                               | S2C   |
| AEK659 | <i>h<sup>-</sup> mad3::ura4<sup>+</sup> leu1 ura4</i>                                                                   | S2C   |
| AEK996 | <i>h<sup>-</sup> bub1::LEU2 plo1<sup>+</sup>-mCherry-hph<sup>R</sup> ark1<sup>+</sup>-GFP-kan<sup>R</sup> leu1 ura4</i> | S4    |

*his2 = his-2-245; leu1 = leu1-32; ura4 = ura4-D18; lys1 = lys1-131*

**Supplementary Figure S1.** *ndc80-AK01* contains a single point mutation in the internal hairpin region.

Alignment of Ndc80 amino acid sequences from 7 different species: *M. musculus*, *R. norvegicus*, *H. sapiens*, *G. gallus*, *X. laevis*, *S. pombe* and *S. cerevisiae*. Data was obtained from UniProt database and aligned using ClustalX online. Only the region surrounding the *ndc80-AK01* mutant allele is presented.

**Supplementary Figure S2.** *ndc80-AK01* is defective in the SAC.

**A.** Exponentially growing cells were shifted from 27°C to 36°C and samples were taken every 40 minutes for 240 minutes. Cells were then stained with DAPI and chromosome over-condensation (yellow arrowhead) was quantified. Scale bar, 10 µm.

**B.** Quantification of cells displaying over-condensed chromosomes. For each time point, more than 150 cells were counted. The values are averages from two experiments.

**C.** A serial dilution assay of strains used in the current study. The number of initial spot cells (far-left) was  $5 \times 10^4$  cells. Cells were plated on YE5S, YE5S containing 10 and 15 µg/ml TBZ at 27°C for 3 d.

**Supplementary Figure S3.** Mad1, Mad3, Bub1 and Bub3 are mis-localized from the kinetochore in *ndc80-AK01*.

**A-H.** Exponentially growing cells were placed in YE5S containing 50 µg/ml TBZ and 60 µg/ml of CBZ at 27°C. After 30 min, aliquots of cells were placed on lectin-coated dishes and imaged for 60 min. Representative images of wild type and *ndc80-AK01* cells that contain Mad1-GFP and Plo1-mCherry (**A**), Mad3-GFP and

Plo1-mCherry (C), Bub1-GFP and Plo1-mCherry (E), Bub3-GFP and Plo1-mCherry (G) are shown. Scale bar, 10  $\mu$ m. Quantification of GFP signal intensities of each SAC components is presented in B (Mad1-GFP), D (Mad3-GFP), F (Bub1-GFP) and H (Bub3-GFP). n > 10 cells.

**Supplementary Figure S4.** Ark1-GFP does not localize to the unattached kinetochores in both *ndc80-AK01* and *bub1 $\Delta$*  cells.

**A.** Representative images of wild type, *bub1 $\Delta$*  and *ndc80-AK01* cells that contain Ark1-GFP and Plo1-mCherry are shown. Scale bar, 10  $\mu$ m.

**B.** Quantification of Ark1-GFP signal intensities. n > 10.

**C.** The duration of mitosis judged by Plo1-mCherry signals at the SPB. n > 30.
